# Supplementary material for: Tight Regulation of Extracellular Superoxide Points to Its Vital Role in the Physiology of the Globally Relevant Roseobacter Clade
Source: PubMed Central journal article supplement (PMC6414704; doi:10.1128/mbio.02668-18), 2019-03-12
Supplement: mBio.02668-18-sf001.pdf [file mBio.02668-18-sf001.pdf]

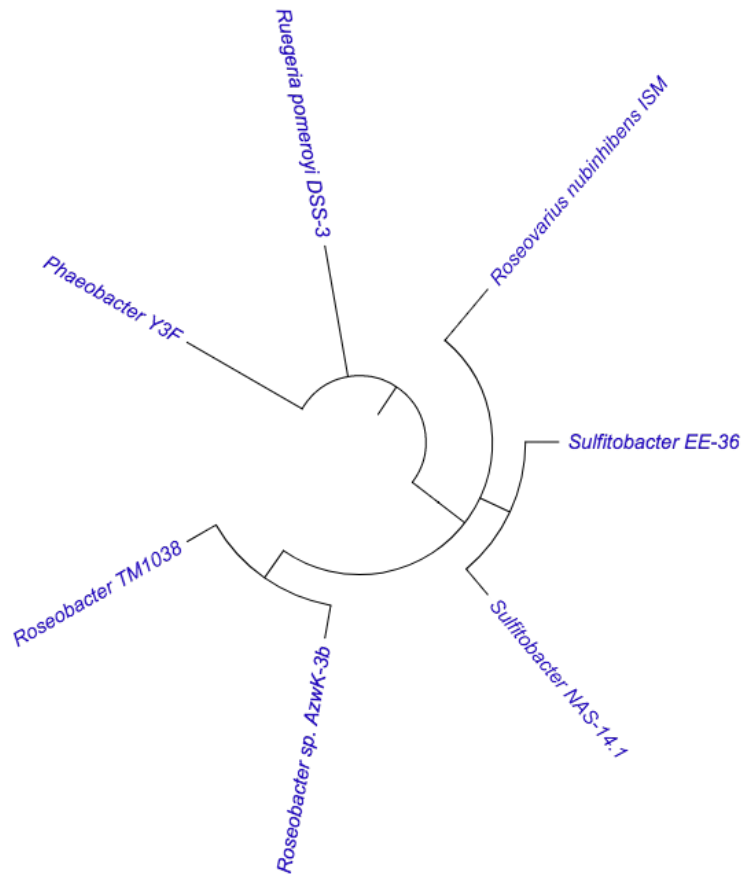

**Figure S1.** Neighbor-joining phylogenetic tree based on 16S ribosomal DNA sequences of seven *Roseobacter* clade bacteria analyzed for this study. Sequences were aligned over >1300 positions using Clustal Omega (<https://www.ebi.ac.uk/tools/msa/clustalo/>) and assembled into a tree using the interactive Tree of Life ((Letunic and Bork, 2011; Letunic and Bork, 2007); <http://itol.embl.de/>). Sequence similarity is only an estimate of evolutionary relationships.
