# Supplementary material for: Tight Regulation of Extracellular Superoxide Points to Its Vital Role in the Physiology of the Globally Relevant Roseobacter Clade
Source: PubMed Central journal article supplement (PMC6414704; doi:10.1128/mbio.02668-18), 2019-03-12
Supplement: mBio.02668-18-sf002.pdf [file mBio.02668-18-sf002.pdf]

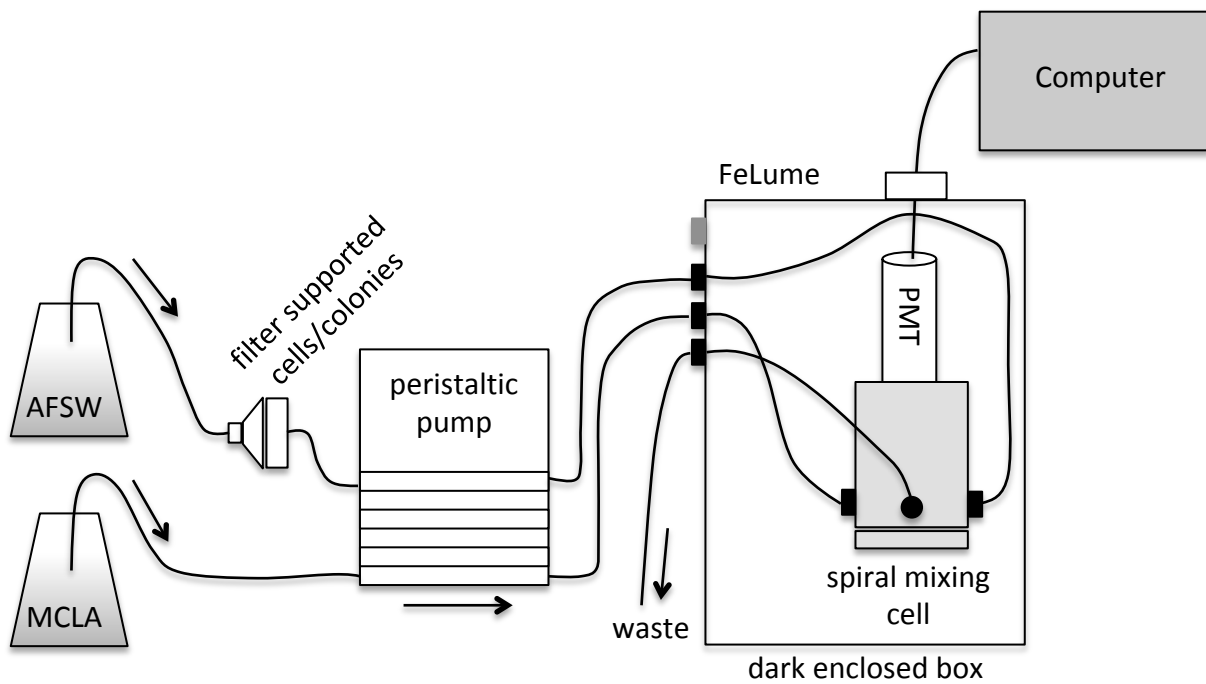

**Figure S2.** Simplified schematic of the flow injection chemiluminescent approach used to measure extracellular superoxide in this research.
