# Supplementary material for: Tight Regulation of Extracellular Superoxide Points to Its Vital Role in the Physiology of the Globally Relevant Roseobacter Clade
Source: PubMed Central journal article supplement (PMC6414704; doi:10.1128/mbio.02668-18), 2019-03-12
Supplement: mBio.02668-18-sf003.pdf [file mBio.02668-18-sf003.pdf]

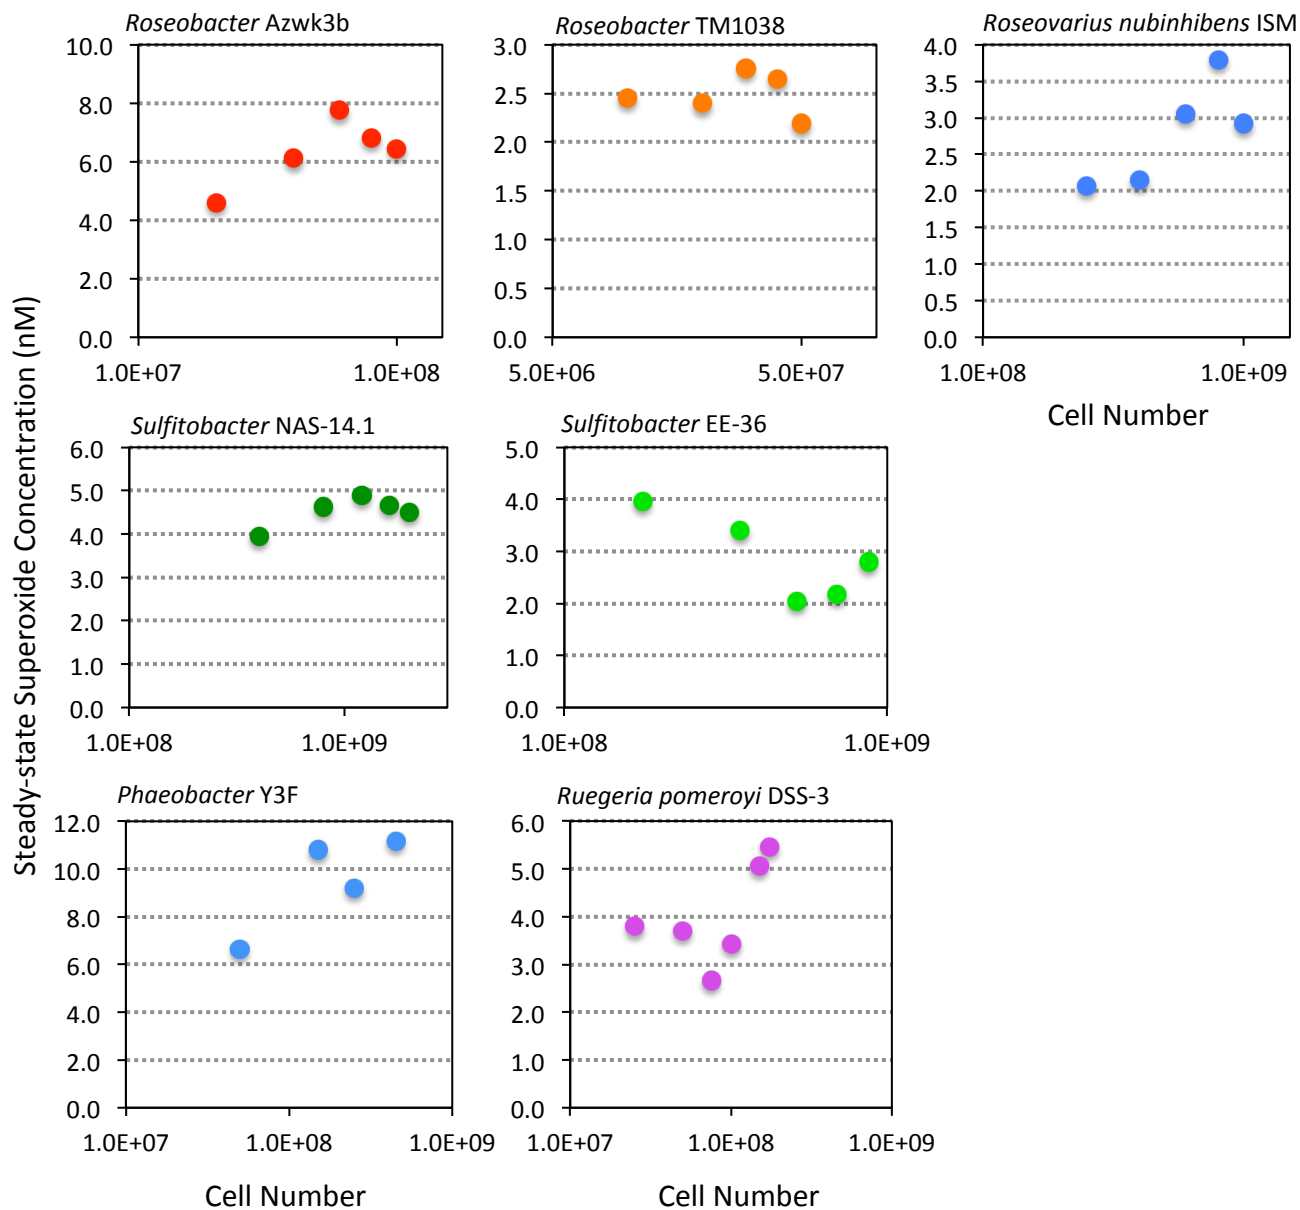

**Figure S3.** Typical steady-state superoxide concentration trends as a function of cell in mid-exponential cultures of 7 *Roseobacter* clade species. Here we illustrate the results of one loading experiment as an example of the range of trends observed.
