# Supplementary material for: Tight Regulation of Extracellular Superoxide Points to Its Vital Role in the Physiology of the Globally Relevant Roseobacter Clade
Source: PubMed Central journal article supplement (PMC6414704; doi:10.1128/mbio.02668-18), 2019-03-12
Supplement: mBio.02668-18-st001.pdf [file mBio.02668-18-st001.pdf]

**Table S1.** *Roseobacter* clade bacteria investigated in this study.

| <b>Species</b>                     | <b>Isolation Location</b>                                 | <b>Isolation selection conditions</b> | <b>Reference</b>         |
|------------------------------------|-----------------------------------------------------------|---------------------------------------|--------------------------|
| <i>Ruegeria pomeroyi</i> DSS-3     | Coastal seawater (Georgia, USA)                           | DMSP degradation                      | Gonzalez et al., 1999    |
| <i>Roseobacter</i> sp. AzwK-3b     | Coastal estuary water (California, USA)                   | Mn(II) oxidation                      | Francis and Hansel, 2006 |
| <i>Roseobacter</i> sp. TM1038      | Phycosphere of dinoflagellate <i>Pfiesteria piscicida</i> | Symbiosis; DMSP degradation           | Miller and Belas, 2004   |
| <i>Roseovarius nubinhibens</i> ISM | Caribbean Sea surface water                               | non-selective                         | Gonzalez et al., 1999    |
| <i>Sulfitobacter</i> sp. NAS-14.1  | North Atlantic Ocean surface water                        | DMSP degradation                      | Moran et al., 2007       |
| <i>Sulfitobacter</i> sp. EE-36     | Intertidal salt marsh water (Georgia, USA)                | aromatic carbon oxidation             | Gonzalez et al., 1996    |
| <i>Phaeobacter</i> sp. Y3F         | Intertidal salt marsh water (Georgia, USA)                | aromatic carbon oxidation             | Gonzalez et al., 1996    |
