# Supplementary material for: Tight Regulation of Extracellular Superoxide Points to Its Vital Role in the Physiology of the Globally Relevant Roseobacter Clade
Source: PubMed Central journal article supplement (PMC6414704; doi:10.1128/mbio.02668-18), 2019-03-12
Supplement: mBio.02668-18-st002.pdf [file mBio.02668-18-st002.pdf]

**Table S2.** Compilation of superoxide measurements for loading experiments with 7 *Roseobacter* species.

| Organism                           | Cell number | Steady-state concentration (nM) | Net production rate (amol cell <sup>-1</sup> h <sup>-1</sup> ) |
|------------------------------------|-------------|---------------------------------|----------------------------------------------------------------|
| <i>Roseobacter</i> sp. AzwK-3b     | 2.0E+07     | 4.60                            | 70.17                                                          |
| <i>Roseobacter</i> sp. AzwK-3b     | 4.0E+07     | 6.12                            | 38.35                                                          |
| <i>Roseobacter</i> sp. AzwK-3b     | 6.0E+07     | 7.75                            | 25.20                                                          |
| <i>Roseobacter</i> sp. AzwK-3b     | 8.0E+07     | 6.79                            | 19.35                                                          |
| <i>Roseobacter</i> sp. AzwK-3b     | 1.0E+08     | 6.43                            | 16.45                                                          |
| <i>Roseobacter</i> sp. AzwK-3b     | 5.0E+06     | 7.34                            | 110.39                                                         |
| <i>Roseobacter</i> sp. AzwK-3b     | 1.0E+07     | 8.22                            | 73.43                                                          |
| <i>Roseobacter</i> sp. AzwK-3b     | 1.5E+07     | 8.80                            | 62.03                                                          |
| <i>Roseobacter</i> sp. AzwK-3b     | 2.0E+07     | 8.46                            | 40.74                                                          |
| <i>Roseobacter</i> sp. AzwK-3b     | 2.5E+07     | 11.70                           | 30.88                                                          |
| <i>Roseobacter</i> sp. AzwK-3b     | 3.0E+07     | 12.78                           | 29.36                                                          |
| <i>Roseobacter</i> sp. AzwK-3b     | 3.5E+07     | 12.60                           | 28.18                                                          |
| <i>Roseobacter</i> sp. AzwK-3b     | 4.0E+07     | 12.90                           | 26.41                                                          |
| <i>Roseobacter</i> sp. AzwK-3b     | 4.5E+07     | 13.70                           | 22.56                                                          |
| <i>Ruegeria pomeroyi</i> DSS-3     | 2.5E+07     | 3.80                            | 18.25                                                          |
| <i>Ruegeria pomeroyi</i> DSS-3     | 5.0E+07     | 3.71                            | 8.90                                                           |
| <i>Ruegeria pomeroyi</i> DSS-3     | 7.5E+07     | 2.66                            | 4.26                                                           |
| <i>Ruegeria pomeroyi</i> DSS-3     | 1.0E+08     | 3.43                            | 4.11                                                           |
| <i>Ruegeria pomeroyi</i> DSS-3     | 1.5E+08     | 5.05                            | 4.04                                                           |
| <i>Ruegeria pomeroyi</i> DSS-3     | 1.8E+08     | 5.46                            | 3.75                                                           |
| <i>Ruegeria pomeroyi</i> DSS-3     | 1.0E+08     | 3.20                            | 3.84                                                           |
| <i>Ruegeria pomeroyi</i> DSS-3     | 2.0E+08     | 2.57                            | 1.54                                                           |
| <i>Ruegeria pomeroyi</i> DSS-3     | 3.0E+08     | 4.48                            | 1.79                                                           |
| <i>Ruegeria pomeroyi</i> DSS-3     | 4.0E+08     | 6.02                            | 1.81                                                           |
| <i>Ruegeria pomeroyi</i> DSS-3     | 5.0E+08     | 6.44                            | 1.55                                                           |
| <i>Phaeobacter</i> sp. Y3F         | 5.0E+07     | 6.62                            | 15.90                                                          |
| <i>Phaeobacter</i> sp. Y3F         | 1.5E+08     | 10.80                           | 8.64                                                           |
| <i>Phaeobacter</i> sp. Y3F         | 2.5E+08     | 9.21                            | 4.42                                                           |
| <i>Phaeobacter</i> sp. Y3F         | 4.5E+08     | 11.17                           | 2.98                                                           |
| <i>Phaeobacter</i> sp. Y3F         | 5.0E+07     | 3.92                            | 9.42                                                           |
| <i>Phaeobacter</i> sp. Y3F         | 1.0E+08     | 3.23                            | 3.87                                                           |
| <i>Phaeobacter</i> sp. Y3F         | 1.5E+08     | 5.31                            | 4.24                                                           |
| <i>Phaeobacter</i> sp. Y3F         | 2.0E+08     | 5.54                            | 3.32                                                           |
| <i>Phaeobacter</i> sp. Y3F         | 5.0E+08     | 18.94                           | 4.55                                                           |
| <i>Phaeobacter</i> sp. Y3F         | 1.0E+09     | 15.88                           | 1.91                                                           |
| <i>Phaeobacter</i> sp. Y3F         | 1.5E+09     | 12.00                           | 0.96                                                           |
| <i>Phaeobacter</i> sp. Y3F         | 2.0E+09     | 6.07                            | 0.36                                                           |
| <i>Roseobacter</i> sp. TM1038      | 1.0E+07     | 2.45                            | 52.95                                                          |
| <i>Roseobacter</i> sp. TM1038      | 2.0E+07     | 2.40                            | 24.40                                                          |
| <i>Roseobacter</i> sp. TM1038      | 3.0E+07     | 2.75                            | 15.95                                                          |
| <i>Roseobacter</i> sp. TM1038      | 4.0E+07     | 2.65                            | 11.53                                                          |
| <i>Roseobacter</i> sp. TM1038      | 5.0E+07     | 2.19                            | 7.75                                                           |
| <i>Roseobacter</i> sp. TM1038      | 2.5E+06     | 4.41                            | 117.54                                                         |
| <i>Roseobacter</i> sp. TM1038      | 5.0E+06     | 4.07                            | 57.60                                                          |
| <i>Roseobacter</i> sp. TM1038      | 7.5E+06     | 3.99                            | 44.07                                                          |
| <i>Roseobacter</i> sp. TM1038      | 1.0E+07     | 3.84                            | 31.77                                                          |
| <i>Roseobacter</i> sp. TM1038      | 1.3E+07     | 3.23                            | 21.02                                                          |
| <i>Sulfitobacter</i> sp. NAS-14.1  | 1.0E+08     | 3.89                            | 4.67                                                           |
| <i>Sulfitobacter</i> sp. NAS-14.1  | 2.0E+08     | 3.88                            | 2.33                                                           |
| <i>Sulfitobacter</i> sp. NAS-14.1  | 3.0E+08     | 3.06                            | 1.22                                                           |
| <i>Sulfitobacter</i> sp. NAS-14.1  | 4.0E+08     | 2.86                            | 0.86                                                           |
| <i>Sulfitobacter</i> sp. NAS-14.1  | 5.0E+08     | 2.30                            | 0.55                                                           |
| <i>Sulfitobacter</i> sp. NAS-14.1  | 4.0E+08     | 3.94                            | 1.18                                                           |
| <i>Sulfitobacter</i> sp. NAS-14.1  | 8.0E+08     | 4.63                            | 0.69                                                           |
| <i>Sulfitobacter</i> sp. NAS-14.1  | 1.2E+09     | 4.89                            | 0.49                                                           |
| <i>Sulfitobacter</i> sp. NAS-14.1  | 1.6E+09     | 4.67                            | 0.35                                                           |
| <i>Sulfitobacter</i> sp. NAS-14.1  | 2.0E+09     | 4.51                            | 0.27                                                           |
| <i>Roseovarius nubinhibins</i> ISM | 5.0E+07     | 1.08                            | 2.60                                                           |
| <i>Roseovarius nubinhibins</i> ISM | 1.0E+08     | 1.53                            | 1.83                                                           |
| <i>Roseovarius nubinhibins</i> ISM | 1.5E+08     | 1.34                            | 1.07                                                           |
| <i>Roseovarius nubinhibins</i> ISM | 2.0E+08     | 1.94                            | 1.17                                                           |
| <i>Roseovarius nubinhibins</i> ISM | 2.5E+08     | 2.06                            | 0.99                                                           |
| <i>Roseovarius nubinhibins</i> ISM | 4.0E+08     | 2.14                            | 0.64                                                           |
| <i>Roseovarius nubinhibins</i> ISM | 6.0E+08     | 3.05                            | 0.61                                                           |
| <i>Roseovarius nubinhibins</i> ISM | 8.0E+08     | 3.80                            | 0.57                                                           |
| <i>Roseovarius nubinhibins</i> ISM | 1.0E+09     | 2.92                            | 0.35                                                           |
| <i>Sulfitobacter</i> sp. EE-36     | 1.8E+08     | 3.95                            | 2.71                                                           |
| <i>Sulfitobacter</i> sp. EE-36     | 3.5E+08     | 3.41                            | 1.17                                                           |
| <i>Sulfitobacter</i> sp. EE-36     | 5.3E+08     | 2.04                            | 0.47                                                           |
| <i>Sulfitobacter</i> sp. EE-36     | 7.0E+08     | 2.17                            | 0.37                                                           |
| <i>Sulfitobacter</i> sp. EE-36     | 8.8E+08     | 2.80                            | 0.38                                                           |
| <i>Sulfitobacter</i> sp. EE-36     | 7.0E+08     | 4.87                            | 0.83                                                           |
| <i>Sulfitobacter</i> sp. EE-36     | 1.4E+09     | 4.32                            | 0.37                                                           |
| <i>Sulfitobacter</i> sp. EE-36     | 2.1E+09     | 4.17                            | 0.24                                                           |
| <i>Sulfitobacter</i> sp. EE-36     | 2.8E+09     | 3.65                            | 0.16                                                           |
| <i>Sulfitobacter</i> sp. EE-36     | 3.5E+09     | 3.45                            | 0.12                                                           |
