# Supplementary material for: Tight Regulation of Extracellular Superoxide Points to Its Vital Role in the Physiology of the Globally Relevant Roseobacter Clade
Source: PubMed Central journal article supplement (PMC6414704; doi:10.1128/mbio.02668-18), 2019-03-12
Supplement: mBio.02668-18-st003.pdf [file mBio.02668-18-st003.pdf]

**Table S3.** Superoxide data for *Ruegeria pomeroyii* DSS-3 life cycle experiments.

| Timepoint | OD    | Time<br>h | Cell Number<br>cells ml <sup>-1</sup> | Mean Steady-State<br>Concentration |         | Mean Cell<br>Normalized<br>Concentration |         | Mean Cell<br>Normalized<br>Production Rate |         |      | Mean<br>Half-life |                 | Mean Decay<br>Rate |  |
|-----------|-------|-----------|---------------------------------------|------------------------------------|---------|------------------------------------------|---------|--------------------------------------------|---------|------|-------------------|-----------------|--------------------|--|
|           |       |           |                                       | nM                                 | Std Dev | amol/cell                                | Std Dev | amol cell <sup>-1</sup> h <sup>-1</sup>    | Std Dev | min  | Std Dev           | s <sup>-1</sup> | Std Dev            |  |
| 1         | 0.025 | 18        | 2.4E-07                               | 1.245                              | 0.067   | 0.053                                    | 0.003   | 6.31                                       | 0.34    | 2.76 | 0.28              | 0.004           | 0.000              |  |
| 2         | 0.067 | 23        | 5.0E+07                               | 2.658                              | 0.104   | 0.054                                    | 0.002   | 6.42                                       | 0.25    | 0.42 | 0.09              | 0.028           | 0.006              |  |
| 3         | 0.127 | 27        | 7.4E+07                               | 4.008                              | 0.151   | 0.054                                    | 0.002   | 6.49                                       | 0.24    | 1.08 | 0.12              | 0.011           | 0.001              |  |
| 4         | 0.216 | 31        | 1.1E+08                               | 5.601                              | 0.267   | 0.050                                    | 0.002   | 5.97                                       | 0.28    | 1.56 | 0.68              | 0.008           | 0.004              |  |
| 5         | 0.364 | 35        | 1.70E-08                              | 9.934                              | 0.492   | 0.059                                    | 0.003   | 7.00                                       | 0.35    | 0.70 | 0.00              | 0.017           | 0.000              |  |
| 6         | 0.628 | 43        | 1.9E+08                               | 10.996                             | 1.177   | 0.058                                    | 0.006   | 7.00                                       | 0.75    | 0.00 | 0.00              | >>0.1           | n/a                |  |
| 7         | 0.651 | 54        | 2.5E+08                               | 0.482                              | 0.270   | 0.002                                    | 0.001   | 0.23                                       | 0.13    | 0.00 | 0.00              | >>0.1           | n/a                |  |
